# Supplementary material for: Production and Characterization of RNA Aptamers Specific for Amyloid Fibril Epitopes
Source: PubMed Central journal article supplement (PMC8782670; doi:10.1074/jbc.m703679200), 2020-09-21
Supplement: mmc1.pdf [file mmc1.pdf]

## SUPPLEMENTARY ONLINE MATERIAL

**Supplementary Fig. 1. Alignments and Logos for selected aptamer pools.** The ‘Genebee’ program (<http://www.genebee.msu.su>) was used to identify 10 ‘supermotifs’ within the selected regions of the sequenced aptamers against the various  $\beta_2m$  targets – low pH monomer (A); WL fibrils (B) or LS fibrils (C). The matching sequence regions are shown within each supermotif together with the names of the aptamers. Logos were generated from these alignments using the ‘Weblogo’ program (<http://weblogo.berkeley.edu>), and are shown below the respective motifs. Of the 19 sequenced anti-monomeric  $\beta_2m$  aptamers, 1 does not fall into any supermotif. The equivalent figures are 4/18 for the anti-WL fibril aptamers and 2/15 for the anti-LS aptamers.

**Supplementary Fig. 2. Secondary structures of the individual aptamers screened.** The secondary structure of WL-2 (see Fig. 2) was confirmed by denaturing polyacrylamide gel electrophoresis (A) after enzymatic digestion with RNase A (shown in blue), RNase T1 (shown in red) and S1 nuclease (shown in green). A base hydrolysis ladder (black) and two further marker lanes are also shown. The Mfold predicted secondary structures of aptamers LS-5 & M-2 are shown in B and C, respectively. The random regions are highlighted in green. Arrows on LS-5 (B) indicate bases, specifically protected from RNase A (blue) & RNase T1 (red) upon addition of LS fibrils, see also Supplementary Figure 3.

**Supplementary Fig. 3. Nuclease protection assays demonstrate specific binding of LS fibrils.** Nuclease protection was used to confirm binding of the cognate target to one of the aptamers, LS-5, using standard methods. Briefly, aptamer LS-5 was digested with RNase A (A) or RNase T1 (B) in the presence of a concentration gradient of LS fibrils (red) or a non-binding control protein, Met J (blue). Example bands showing protection (labelled on the left) were subjected to image densitometry. The resulting plots of relative intensity change (y axis) vs gel position (x-axis, arbitrary units) are shown to the right of the autoradiographs and clearly show decreasing band intensities with increasing fibril concentration (red) whilst no consistent changes occur for the MetJ lanes (blue). These demonstrate specific nuclease protection of LS-5 by LS fibrils. A summary of all protected sites is shown alongside the secondary structure plot of Supplementary Figure 2B.

**Supplementary Fig. 4. Extended sensorgrams of aptamer WL-2 binding.** Aptamer RNA was injected over flow-cells derivatised with WL fibrils (blue) or LS fibrils (red), then left to dissociate over ~35000 seconds. Sensorgrams show that the aptamer RNA does dissociate from fibrils over extended time periods.

**Supplementary Table 1. Affinities of the aptamers derived from the SPR assay.** Tables show the apparent kinetic parameters for aptamers WL-2, M-2 & LS-5 binding to monomeric  $\beta_2m$ , WL fibrils & LS fibrils. Residual traces (not shown) suggest that ‘kinetic fits’ fall within 0.5% of experimental data. The derived kinetic parameters for repeated experiments are within 10% of each other, suggesting that these values are highly reproducible.

# A

## LOCAL SUPERMOTIF 1

M3 -----GAGCAGCACCGGGCCACG--GCGCAATCACCTAAAATCGGAGCCGCCGGGTG  
 M7 -GGAGGCCGAGAGGGCAGAACCCAGCGACGCGACGGAAAGACCATAACGGCAGC-----  
 M8 -----GCACACGGGCCGCACCC-----CT--GCGAAACGACTATACGTCACTAGAGCAGGTTT  
 M1A GCACCTCGTTGAAGGAAG-----GACGGTGCGGAAAAAATAACGCACAACCGGCA---

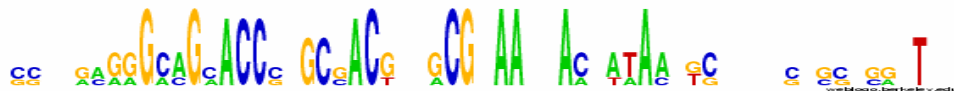

## LOCAL SUPERMOTIF 2

M10 ----GTGCGAGCAGGGCAACCAGAAGAAAACGTAGGTAGAGTG  
 M7A TTACGGATAGGCAAGGCAA---GGAGGAAACGATGCCCGGGGA  
 M13A ---GTGACCAAGGTAGTAACCAAGAGAAAACGTGTTCCAGGGT

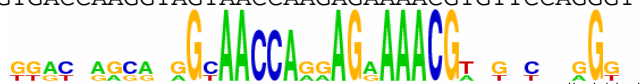

## LOCAL SUPERMOTIF 3

M8 GCACACGGGCCGCACCCCTGCGAAACGACTATAACG  
 M6A -GCGCTGAGCCTCAGCCTGGGGACAAAACAGTTG  
 M11A ----GTATGAGTCAGGCCTGGGAAAAGCAACGACG

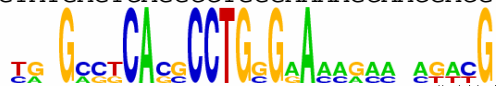

## LOCAL SUPERMOTIF 4

M12 CAGACATCTACGTGGGCAGGGAGCATTG  
 M8A CACTGAAATGTGTGGGCACATGGACAAG  
 M10A TAGGGGGTGGCGTGGGCATTCTAAAGCG

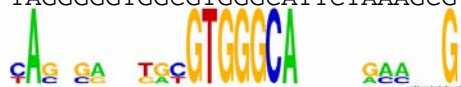

## LOCAL SUPERMOTIF 5

M1 ---GATTAGGCGAACATAGTAGTGAAGAAAGTACAGCATGAGGGGCT-----  
 M2 GTTGGTTACGCGTAC-----AGTGA---CTCGGAAAGTTGAAGGGCCAAATGGGAA

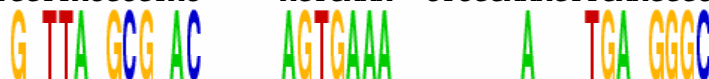

## LOCAL SUPERMOTIF 6

M7 GAGGCCGAGAGGGCAGAACCCAGCGACG-CGACGGAAAGACCATAACGGCAGC  
 M8 ---GCACACGGGCCGCACCCCTGCGAAA-CGACTATACGTCACTAGAGCAGGT  
 M10A TCGTAGGGGGTGGCGTGGGCATTCTAAAGCGGCTAGGCGTGACCCGGAG----  
 M11A AAGCAACGACGGGCGTAGGCATACAAA-CGTTTCGTTGGCAATGT-----

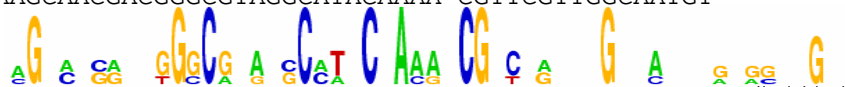

## LOCAL SUPERMOTIF 7

M10 GGGCAACCAGAAGAAAACGTAGGTAGAGTG  
 M6A CACGCCCTGGGGACAAAACAGTTGCAAATGG  
 M11A GGCGTAGGCATACAAAACGTTTCGTTGGCAA  
 M13A TAGTAACCAAGAGAAAACGTGTTCCAGGGT

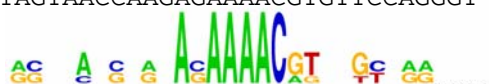

**LOCAL SUPERMOTIF 8**

M1 -----AGTAAAAGAAAGTACAG-CATGAGGGGCT-----  
M7 GGAGGCCGAGAGGGCAGAACCCAGCGACGCGACGGAAAGA  
M10 ----GTGCGAGCAGGGCAACCA-GAAGAAAACGTAGGTAG  
M11 AAGAGCGGAGAACGTTGAACCGACCGGAGG-----  
M13 -----GCGAACGAGACAACCA-GATAAGGACCGCCCAAT  
M1A -----CGTTGAAGGAAGGACGGTGC GGAAAAAATAACG  
M8A -----ATGGACAAGCGACCCA-CATACGCTGTGGGCACA

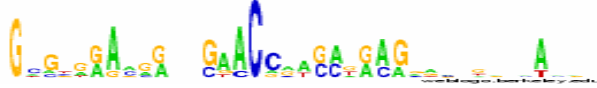

**LOCAL SUPERMOTIF 9**

M5 -----GG-TACCGAAAAGTCATTTGGTTACAACCAGGCAGGCGCAGGAA  
M1A TGAAGGAAGGACGG-TGCGGAAAAAATAACGCACAACGCGGCA-----  
M6A GCTGAGCCTCACGCCCTGGGGACAAAA-CAGTTGCAAATGGCGTTGACAA-----

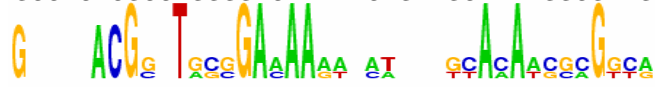

[weblogo.berkeley.edu](http://weblogo.berkeley.edu)

**LOCAL SUPERMOTIF 10**

M1 GTGAAAGAAAGTACAGCATGAGGGGCT---  
M3 GAGCCGCCGGGTGCAGCATGTGAC-----  
M6 TGAGCGACTGAGGCAGCATGGAATCATACG

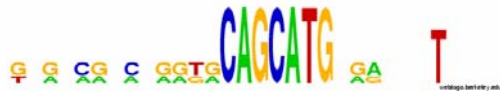

[weblogo.berkeley.edu](http://weblogo.berkeley.edu)

Supplementary Figure 1A

# B

## LOCAL SUPERMOTIF 1

WL9 ACACGGAGGCACCTACAGTACTGGGGCAGGAGTTGCGCAGAGGACTAGTGGAAAAGGAGT  
 WL22 ACACGGAGGCACCTACAGTACTGGGGCAGGAGTTGCGCAGAGGACTAGTGGAAAAGGAGT



weblogo.berkeley.edu

## LOCAL SUPERMOTIF 2

WL9 CACCTACAGTACTGGGGCAGGAGTTGCGCAGAGGAC--T-----AGTGGAAAAGGAGT----  
 WL14 -----GAGACAAGTCGGTAGGAC-AGAGGAGTGAACAAAAGAAGCAGAGAGGAGAGTCAAGAGC  
 WL16 AGAAATATAAACGTGGGGAGGACCAGGGGAGAGTAC--TCCAAAGAGTGAAGAAGGTT-----  
 WL22 CACCTACAGTACTGGGGCAGGAGTTGCGCAGAGGAC--T-----AGTGGAAAAGGAGT----



weblogo.berkeley.edu

## LOCAL SUPERMOTIF 3

WL1 ATACACAGAACAGAGGAGAAGGGGATGAATCAATA  
 WL9 AGGAGTTGCGCAGAGGACTAGTGGAAAAGGAGT--  
 WL16 TATAAACGTGGGGAGGACCAGGGGAGAGTACTCCA  
 WL22 AGGAGTTGCGCAGAGGACTAGTGGAAAAGGAGT--



weblogo.berkeley.edu

## LOCAL SUPERMOTIF 4

WL3 ACCATTGGTCAGTGGCAGAGGTTTCATCACCGTC  
 WL9 GCAGAGGACTAGTGGAAAAGGAGT-----  
 WL11 GACGTAAAGAAGACGAAAGGGAGAACATTCGGG  
 WL13 GGTGTGCGTGAGTTGAAAAGGCAGGGCAA----  
 WL18 -----AAAAGGACAGGAGC-----  
 WL22 GCAGAGGACTAGTGGAAAAGGAGT-----



weblogo.berkeley.edu

## LOCAL SUPERMOTIF 5

WL1 ATGAGAATA-----CACAGAACAGAGGAGAA-G---GGGATGAATCAATAAGGTCACACTAACCAAA  
 WL2 AAGTGTGTA-----CACTAAAAAGCTAGCCCCC---GGAAAGAA-----CGTCAACAAAAGTAA  
 WL6 -----CGGAAGAGCACAAAAAAGGGGACTCGCCTTGAAGGAA-----CCTGC-----  
 WL11 -----GCCAGCACGACAAAGAGCAGGA-C---GTAAAGAAGACGAAAGGGAGAACATTCGGG



weblogo.berkeley.edu

## LOCAL SUPERMOTIF 6

WL1 GAGAATACAC---AGAACAGAGGAG-----A--AGGGGATGAATCAATAAGGTCACACTAACcaacac-  
 WL7 aggccTAAAC---GAATGAACGGGG-----A--AAGTAAGGAATGATTGGGACCATACAcagt-----  
 WL11 -----GCCAGCACGACAAAGAGCAGGACG-tAAAGAAGACGAAAGG-GAGaacattcggggagacga  
 WL14 GAGACAAGTCGGTAGGACAGAGGAGTGAACA--AAAGAAGCAGAGAGGAGAGTCAAGAGCAGC-----  
 WL21 actATAAGTCAG---ATGGAGGGGG-----AgcATGAAACAATTGTTTAAAGAACGTAAAatggctga--



weblogo.berkeley.edu

## LOCAL SUPERMOTIF 7

WL2 -----AAAAATAAAGTGTGTACACTAAAAAGCTAGCCCCCGGAAAGAACGTCAACAAAAGTAAGT  
 WL5 ACACCTGGAATTAATTCAGGACACCCAA---CGCGCCTACGAATAGAGCGGGAACGACGACC---



weblogo.berkeley.edu

**LOCAL SUPERMOTIF 8**

WL1 CACAGAACAGAGGA-GAAGGGG---ATGAATCAATAAGGTCACAC  
WL21 ACTATAAGTCAGATGGAGGGGGAGCATGAAACAATTGTTTAAGAA

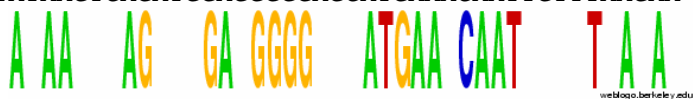

**LOCAL SUPERMOTIF 9**

WL1 -----ATGAGAATACACAGAACAGAGGAGAAGGGGATGAATCA  
WL16 AGGACCAGGGGAGAGTACTCCAAAGAGTGAAGAAGGTT-----

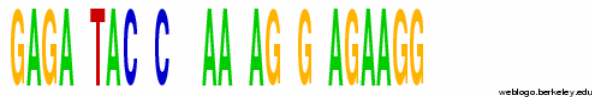

**LOCAL SUPERMOTIF 10**

WL2 ---AAAAATAA-----AGTGTGTACTACTAAAAAGCTAGCCCCCG  
WL6 -----CGGAAGAGCACAAAAAAGGGGACTCGCCTT  
WL14 GGTAGGACAGA-----GGAGTGAACAAAAGAAGCAGAGAGGAGA  
WL16 -----CGCAAGAAATATAAACGTGGGGAGGACCAGGGGAGAGTACTCCAAAGAGTGAAGAAGGT

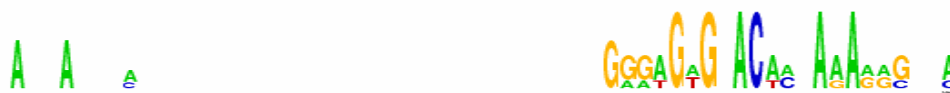

## Supplementary Figure 1B

C

**LOCAL SUPERMOTIF 1**

LS12 -----GGTAAGGTGGAAGGGAAAAGGAAA-----CGGAATGAACCCGCGTTATGG  
 LS1B -----AAGTGAGAGGCCAAAAGGAAAAAAAAAGGTGAACAAGGCTGCTC-----  
 LS5 TCGGCGGAGGAGTGGGAAGAAAACGAGAGAAGAGTTGGAACG-----  
 LS5B -----GCAGGGGGAAAGGGA--TTGAACGAGAAGAAGGAGGAGC-----  
 LS8 AGGGCAGCGGCGA-GAAGGGGAAA---AA-----AGAAAAGAACTATTTCGTGGAG

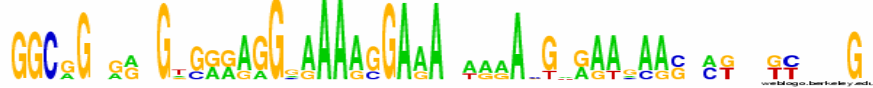

**LOCAL SUPERMOTIF 2**

LS1B CCGCACACATAAGGG-----GGAGGGAAAGACAGCAGAATAAAGAGGAG  
 LS12 GGTAAGGTGGAAGGG-----AAAAGGAAACGGAATGAACCCGCGTTATG  
 LS1B -----AAGTG-----AGAGGCCAAAAGGAAAAAAAAAGGTGAACAA  
 LS5 -----GCAAACGGGGCGTTTTCCGGCGGAGGAGTGGGAAGAAAACGAGAGAAGAGTTGGA  
 LS5B -----GCAGGGGGAAAGGGATTGAACGAGAAGAAGG  
 LS8 -----CCTGGAGGAGGGCAGCGGCGA-GAAGGGGAAAAAAGAAAAGAACTATTTCGTGG

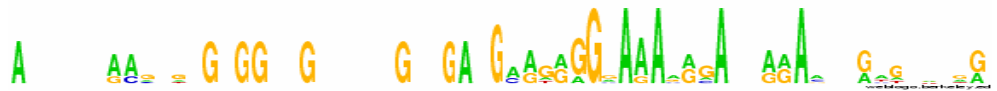

**LOCAL SUPERMOTIF 3**

LS1B GCCGCACACATAAGGGGGAGGGAAA--GACAGCAGAATAAAGAGGAGGCGATAGTGC-----  
 LS12 -----GGTAAGGTGGAAGGGAAAAGGAAACGGAATGAACCCGCGTTATGGCCGAAAAGG  
 LS5B -----GCAGGGGGAAAGGGAT--TGAACGAGAAGAAGGAGGAGC-----  
 LS9 ---GGGGCTTCATGAGAGAAGGAAC--CACAGACGAAAAAAGGGGGCGTTCAAGAGGAAG

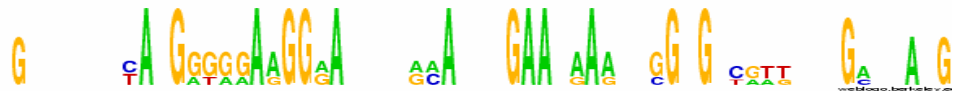

**LOCAL SUPERMOTIF 4**

LS10 -----ATTAACGAGATGAAGGAAACGGGAGGGAG  
 LS5B AAAGGGATTGAACGAGAAGAAGGAGGAGC-----  
 LS9 AGGAACCACAGACGAAAAAAGGGGGCGTTCAAGA  
 LS9B TAAGCTTGCCTCGAAGATGAAGAAAATGTCGAATCC

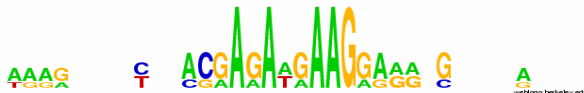

**LOCAL SUPERMOTIF 5**

LS10 ---GAGGGA--GACAGGCACAACGGCGACAGAAAAGAGAGAGTGC-----  
 LS1B TAAGGGGGAGGGAAAGACAGCAGAATAAAGAGGAGGCGATAGTGC-----  
 LS15B CGAGGACGA--AAGAGTTTAGAAAAGGAGACGGCGCTTTCGAACGAACCA  
 LS5B GCAGGGGGA--AAGGGATTGAACGAGAAGAAGGAGGAGC-----  
 LS7B TGAGGGGAG--GTTGGCCGAAGGCCAGGCAGCAGCACCAGAAGTTTTT  
 LS8 ---GAGGCG--AGCGCGAGAAGGGGAAAAAAGAAAAGAACTATTTCGTG

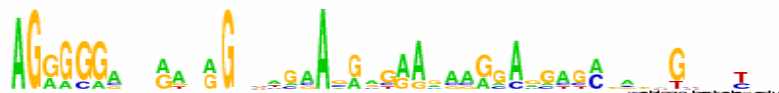

**LOCAL SUPERMOTIF 6**

LS12 AGGTGGAAGGGAAAAGGAAACGG-----AATGAACCCGCGTTATGG  
 LS15B AAAGAGTTTAGAAAAGGAGACGGCGCTTTCGAACGAACCATCCCCTAGG

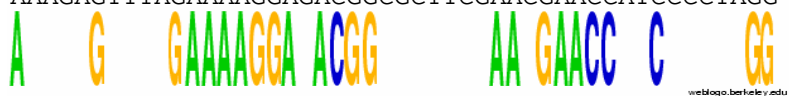

**LOCAL SUPERMOTIF 7**

LS10 CGAGATGAAGGAAACGGGAGGGAGACAGGCACAACGGCGA-----CAGAAAAGAGAGAGTGC-----  
LS5 -----GCAAACG---GGGGCGTTTCGGCGGAGGAGTGGGAAGAAAAACGAGAGAAGAGTTGGAA  
LS7B -----TGAG---GGGAGGTTGGCGCGAAGGCGAGGCAGCAGCACCAGAAGTTTTTTGAGTTCC  
LS9 ACAGACGAAAAAAGG---GGGGCGTTCAAGAGGAAGAGACCGA-----

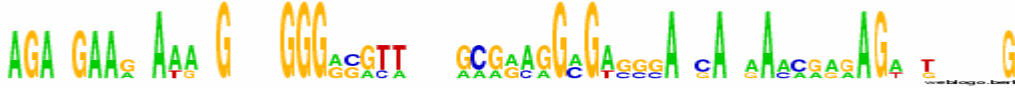

**LOCAL SUPERMOTIF 8**

LS10 -ATTAACGAGATGAAGGAAACGGGAGGGAGACAG  
LS1B ACAGCAGAATAAAGAGGAGGCGGATAGTGC-----  
LS12 AGGTGGAAGGGAAAAGGAAACGGAATGAACCCGC  
LS15B AAAGAGTTTAGAAAAGGAGACGGCGCTTCGAACG  
LS8B -----GAAAAGGAGGGGATTTGAAATCGC  
LS9 GGGGGCGTTCAAGAGGAAGAGACCGA-----

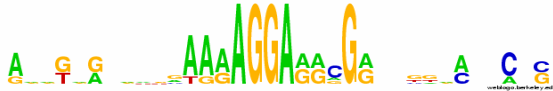

**LOCAL SUPERMOTIF 9**

LS1B CACACATAAGGGGAGGGAAAGACAG--C--AGAATAAAGAGGAGGCGAT  
LS1B AAGTGAGAGGCAAAAGGAAAAAAG--G--TGAACAAGGCTGCTC-----  
LS8 GGCAGCGGCGAGAAGGGGAAAAAAGAAA--AGAACTATTCGTGGAGCGG  
LS9 GAAGGAACCACAGAC-G-AAAAAAAG--GGGGCGTTCAAGAGGAAGAGA

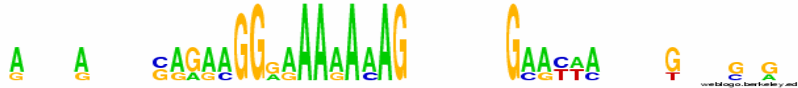

**LOCAL SUPERMOTIF 10**

LS12 -----gtaaggtggaaggGAAAAGGAAACGGAATGAACCCGCGTTATGGCCGAAaagggac-----  
LS4b -ggccCGACGA-----AGTGGGGGGAGGAACGTCGTGTTGAGTGATTGGAGtccctgggc  
LS5 cgtttCGGCGG-----AGGAGTGGGAAGAAAAACGAGAGAAGAGTTGGAACg-----  
LS8b -----GAAAAGGAGGGGATTTGAAATCGCGTGAAAGGTGAAAttgtttgcagg

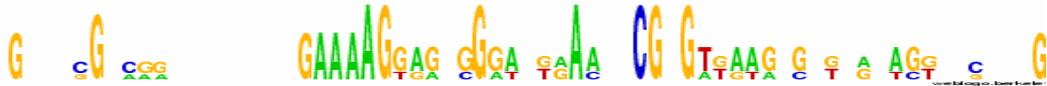

Supplementary Figure 1C

# Supplementary Figure 2.

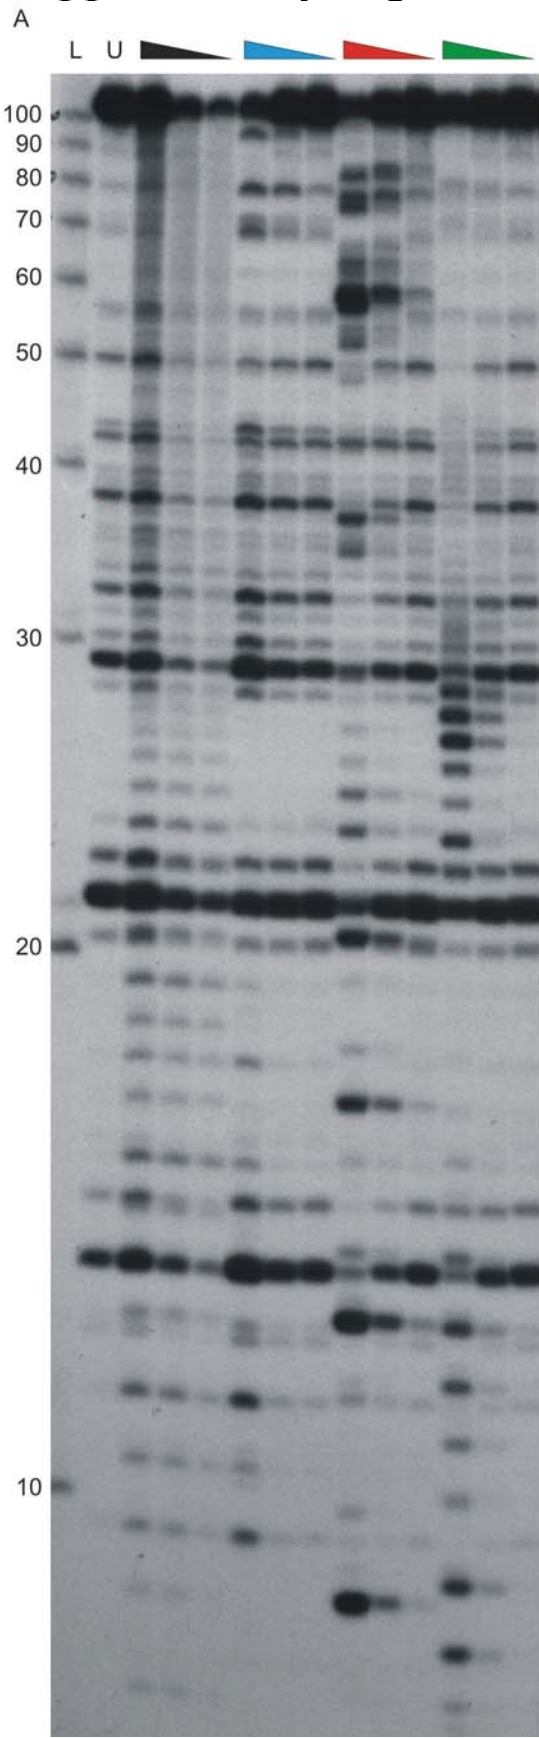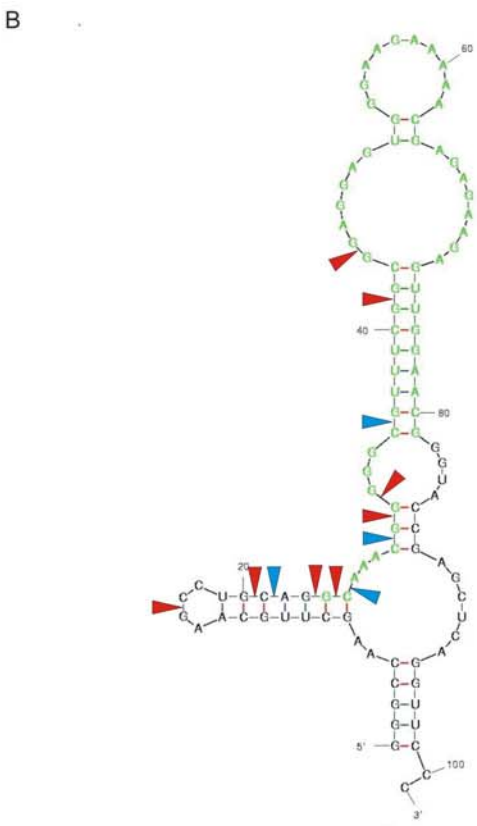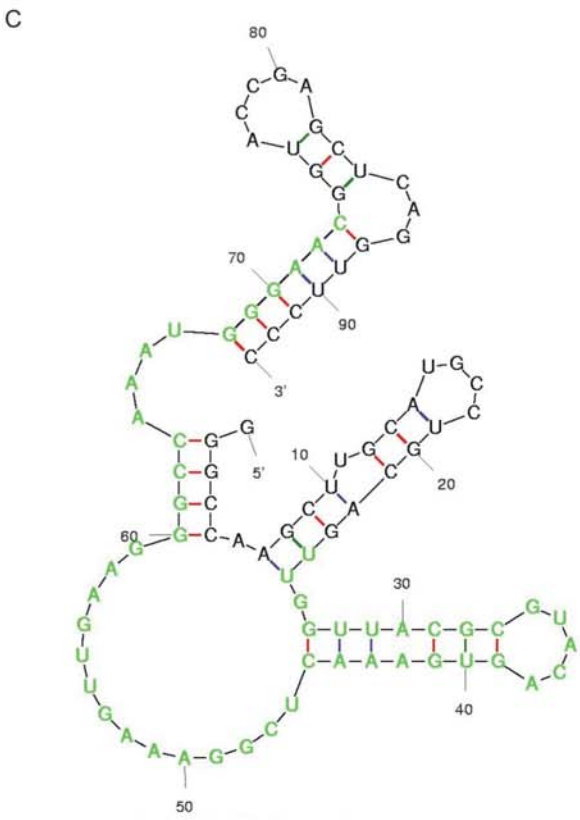



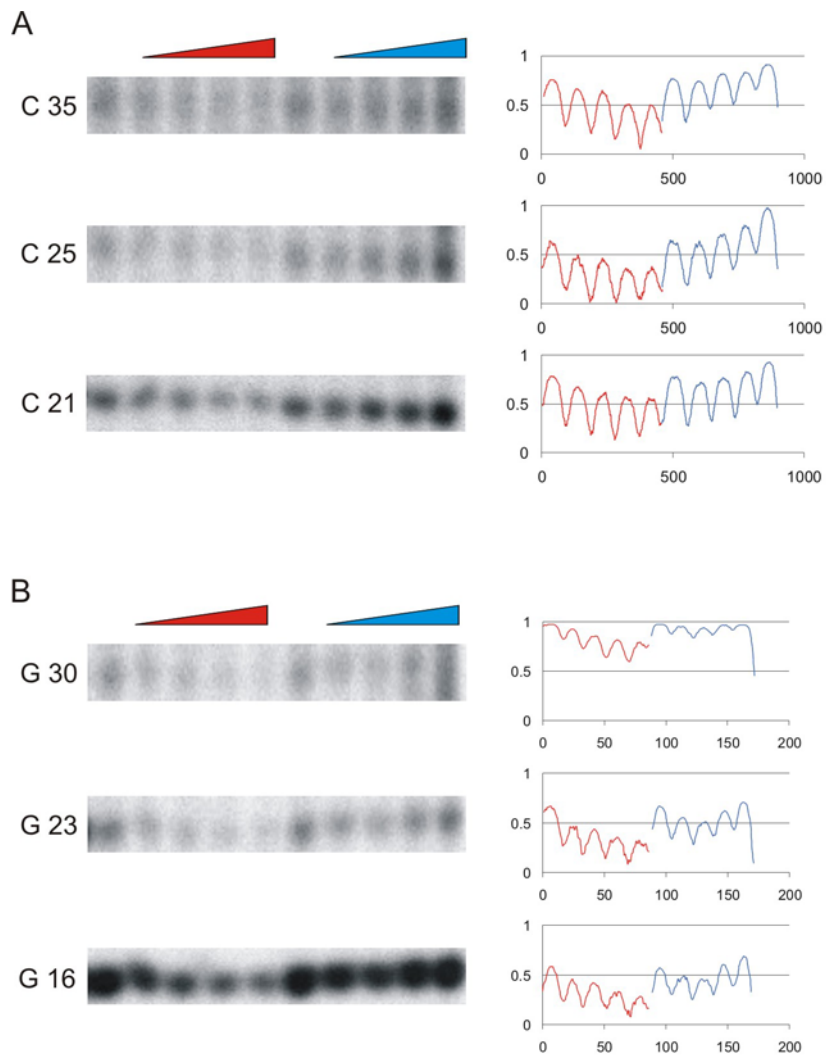

Supplementary Figure 3.

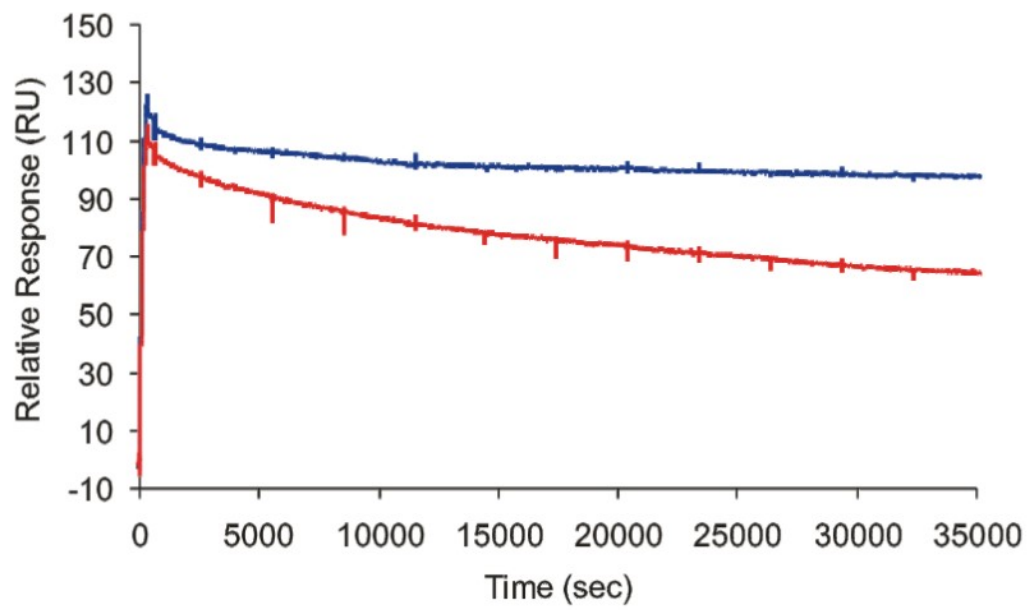

Supplementary Figure 4.

Supplementary Table 1. Affinities of the aptamers derived from the SPR assay.

| Aptamer | Target  | Apparent dissociation rate constant |          | Apparent association rate constant |          | Apparent equilibrium dissociation constant |                |                 |         |        |          |
|---------|---------|-------------------------------------|----------|------------------------------------|----------|--------------------------------------------|----------------|-----------------|---------|--------|----------|
|         |         | $k_{diss}$ (1/sec)                  | SE(kd)   | $k_{ass}$ (1/M.sec)                | SE(ka)   | $K_D$ (M)                                  | $R_{max}$ (RU) | SE( $R_{max}$ ) | RI (RU) | SE(RI) | $\chi^2$ |
| WL-2    | Monomer | 0.0504                              | 5.50E-02 | 9.45E+03                           | 3.51E+04 | 5.34E-06                                   | 16.4           | 36.2            | 17.1    | 0.952  | 4.73E+00 |
|         | WL      | 8.37E-04                            | 1.13E-05 | 1.12E+05                           | 1.26E+03 | 7.48E-09                                   | 593            | 2.8             | 426     | 1.29   |          |
|         | LS      | 8.42E-04                            | 9.10E-06 | 1.10E+05                           | 983      | 7.63E-09                                   | 754            | 2.62            | 503     | 1.29   |          |
| M-2     | Monomer | 8.13E-03                            | 1.06E-03 | 7.10E+05                           | 9.75E+04 | 1.15E-08                                   | 34.4           | 1.89            | 47.6    | 0.905  | 9.10E-01 |
|         | WL      | 7.48E-04                            | 3.12E-05 | 1.76E+05                           | 8.04E+03 | 4.25E-09                                   | 766            | 26.7            | 155     | 0.855  |          |
|         | LS      | 3.55E-03                            | 5.59E-05 | 5.21E+05                           | 1.24E+04 | 6.82E-09                                   | 279            | 3.12            | 207     | 0.89   |          |
| LS-5    | Monomer | 8.16E-03                            | 1.96E-04 | 4.78E+04                           | 3.53E+03 | 1.71E-07                                   | 30.1           | 0.746           | 15.2    | 0.578  | 2.39E+00 |
|         | WL      | 6.71E-04                            | 1.48E-05 | 2.45E+04                           | 227      | 2.74E-08                                   | 285            | 1.04            | 63.4    | 0.458  |          |
|         | LS      | 3.97E-04                            | 1.15E-05 | 1.79E+04                           | 169      | 2.21E-08                                   | 411            | 1.91            | 57.5    | 0.436  |          |
